# Supplementary material for: Transcriptional control of motor pool formation and motor circuit connectivity by the LIM-HD protein Isl2
Source: eLife. 2023 Oct 23;12:e84596. doi: 10.7554/eLife.84596 (PMC10637776; doi:10.7554/eLife.84596)
Supplement: Figure 2—figure supplement 1—source data 1. [file elife-84596-fig2-figsupp1-data1.xlsx]

## Sheet: Sheet1
Figure 2-figure supplement 1-source data 1
Figure 2-figure supplement 1c		Isl2-null	MMC	LMC	LMCl
% of ectopic MNs in Isl2-null embryos		Embryo No.	Lhx3	Foxp1	Lhx1
		#1	25.7406	59.7331	62.5
		#2	31.1803	49.4118	49.1649
		#3	40.1489	48.9782	62.6254
		average	32.3566	52.7077	58.0968
