# Supplementary material for: Transcriptional control of motor pool formation and motor circuit connectivity by the LIM-HD protein Isl2
Source: eLife. 2023 Oct 23;12:e84596. doi: 10.7554/eLife.84596 (PMC10637776; doi:10.7554/eLife.84596)
Supplement: Figure 2—source data 1. [file elife-84596-fig2-data1.xlsx]

## Sheet: Sheet1
Figure 2-source data
Figure 2c		Brachial	Isl2 +/-	MMC	LMC			MMC							LMC
			#1	36.3333	67.8333			Unpaired t test results:		n.s.					Unpaired t test results:		n.s.
			#2	21.6667	69			P value and statistical significance:							P value and statistical significance:
			#3	23.8333	58.6			The two-tailed P value equals 0.5139							The two-tailed P value equals 0.2931
			average	27.2778	65.1444			By conventional criteria, this difference is considered to be not statistically significant.							By conventional criteria, this difference is considered to be not statistically significant.
			std	7.91681	5.6976			Confidence interval:							Confidence interval:
			sem	4.57077	3.28951			The mean of Het_MMC minus KO_MMC equals 3.4133							The mean of Het_LMC minus KO_LMC equals 6.4767
								95% confidence interval of this difference: From -9.8334 to 16.6601							95% confidence interval of this difference: From -8.3920 to 21.3453
			Isl2 -/-	MMC	LMC			Intermediate values used in calculations:							Intermediate values used in calculations:
			#1	25.6667	57.5			t = 0.7154							t = 1.2094
			#2	24.75	52			df = 4							df = 4
			#3	21.1667	66.5			standard error of difference = 4.771							standard error of difference = 5.355
			average	23.8611	58.6667
			std	2.37804	7.32006
			sem	1.37296	4.22624
		Lumbar	Isl2 +/-	MMC	LMC			MMC							LMC
			#1	25.1875	54.125			Unpaired t test results:		n.s.					Unpaired t test results:		n.s.
			#2	21.0714	56.3077			P value and statistical significance:							P value and statistical significance:
			#3	11.4	34.1			The two-tailed P value equals 0.4659							The two-tailed P value equals 0.6287
			average	19.2196	48.1776			By conventional criteria, this difference is considered to be not statistically significant.							By conventional criteria, this difference is considered to be not statistically significant.
			std	7.07783	12.2403			Confidence interval:							Confidence interval:
			sem	4.08638	7.06693			The mean of Het_MMC minus KO_MMC equals -3.4667							The mean of Het_LMC minus KO_LMC equals -4.7567
								95% confidence interval of this difference: From -15.4206 to 8.4873							95% confidence interval of this difference: From -30.0186 to 20.5052
			Isl2 -/-	MMC	LMC			Intermediate values used in calculations:							Intermediate values used in calculations:
			#1	24.9286	41.6429			t = 0.8052							t = 0.5228
			#2	20.25	56.9167			df = 4							df = 4
			#3	22.875	60.25			standard error of difference = 4.305							standard error of difference = 9.099
			average	22.6845	52.9365
			std	2.34509	9.92158
			sem	1.35394	5.72823
		Thoracic	Isl2 +/-	MMC	HMC	PGC		MMC							HMC							PGC
			#1	22.4545	34.4091	30.0455		Unpaired t test results:		n.s.					Unpaired t test results:		n.s.					Unpaired t test results:		**
			#2	32.0556	29.5	38.3333		P value and statistical significance:							P value and statistical significance:							P value and statistical significance:
			#3	27.0455	40.4545	39.5		The two-tailed P value equals 0.1338							The two-tailed P value equals 0.3014							The two-tailed P value equals 0.0051
			average	27.1852	34.7879	35.9596		By conventional criteria, this difference is considered to be not statistically significant.							By conventional criteria, this difference is considered to be not statistically significant.							By conventional criteria, this difference is considered to be very statistically significant.
			std	4.80203	5.48709	5.15491		Confidence interval:							Confidence interval:							Confidence interval:
			sem	2.77245	3.16797	2.97619		The mean of Het_MMC minus KO_MMC equals -15.7233							The mean of Het_HMC minus KO_HMC equals -6.3233							The mean of Het_PGC minus KO_PGC equals 20.1267
								95% confidence interval of this difference: From -38.9862 to 7.5395							95% confidence interval of this difference: From -21.1319 to 8.4852							95% confidence interval of this difference: From 10.0989 to 30.1544
			Isl2 -/-	MMC	HMC	PGC		Intermediate values used in calculations:							Intermediate values used in calculations:							Intermediate values used in calculations:
			#1	30.1667	34	19.875		t = 1.8766							t = 1.1856							t = 5.5726
			#2	57.3889	48.8333	14.3684		df = 4							df = 4							df = 4
			#3	41.1667	40.5	13.25		standard error of difference = 8.379							standard error of difference = 5.334							standard error of difference = 3.612
			average	42.9074	41.1111	15.8311
			std	13.6943	7.43553	3.54645
			sem	7.90643	4.2929	2.04754
