# Supplementary material for: Transcriptional control of motor pool formation and motor circuit connectivity by the LIM-HD protein Isl2
Source: eLife. 2023 Oct 23;12:e84596. doi: 10.7554/eLife.84596 (PMC10637776; doi:10.7554/eLife.84596)
Supplement: Figure 3—source data 1. — It also includes the average cell count per embryo in flexor carpi ulnaris (FCU) (Foxp1+Scip+), cutaneous maximus (CM) (Isl1+Etv4+), and latissimus dorsi (LD) (Isl1-Etv4+) motor pools (Figure 3c). [file elife-84596-fig3-data1.xlsx]

## Sheet: Sheet1
Figure 3-source data 1
Figure3b
Lhx3, Scip: V-D axis (μm)		C6: Lhx3					C8: Lhx3					One-way ANOVA post-hoc Bonferroni
		embryo No.	Het	KO	cKO		embryo No.	Het	KO	cKO
		#1	51.0253	78.6023	84.0429		#1	66.8374	102.538	96.1264		Y position	C6	Lhx3
		#2	55.2137	80.8486	84.5141		#2	60.8701	99.9398	109.437		Het	KO	0.0013	**
		#3	60.2667	92.0608	85.4534		#3	65.282	102.162	122.059		Het	cKO	0.0011	**
												KO	cKO	> 0.9999	n.s.
		average	55.5019	83.8372	84.6701		average	64.3298	101.547	109.207
		std	4.62746	7.20984	0.718085		std	3.09548	1.40414	12.9677		Y position	C8	Lhx3
		sem	2.67167	4.1626	0.414587		sem	1.78718	0.810679	7.48691		Het	KO	0.0032	**
												Het	cKO	0.0012	**
												KO	cKO	0.813	n.s.
		C6: Scip					C8: Scip					One-way ANOVA post-hoc Bonferroni
		embryo No.	Het	KO	cKO		embryo No.	Het	KO	cKO
		#1	54.428	75.57	52.8707		#1	53.9879	46.1191	39.2201		Y position	C6	Scip (MMC)
		#2	60.7326	62.2694	46.3923		#2	51.7975	63.9508	67.4068		Het	KO	0.16	n.s.
		#3	47.1362	61.8431	46.3963		#3	49.5989	64.9642	60.0494		Het	cKO	0.98	n.s.
												KO	cKO	0.04	*
		average	54.0989	66.5608	48.5531		average	51.7948	58.3447	55.5588
		std	6.80418	7.80506	3.73916		std	2.19448	10.5998	14.62		Y position	C8	Scip (MMC)
		sem	3.92839	4.50625	2.15881		sem	1.26698	6.1198	8.44089		Het	KO	> 0.9999	n.s.
												Het	cKO	> 0.9999	n.s.
												KO	cKO	> 0.9999	n.s.
Isl1, Lhx1: M-L axis (μm)		C6: Isl1					C8: Isl1					One-way ANOVA post-hoc Bonferroni
		embryo No.	Het	KO	cKO		embryo No.	Het	KO	cKO
		#1	279.099	281.897	289.029		#1	269.875	282.347	269.345		X position	C6	Isl1
		#2	262.077	287.662	294.388		#2	257.251	270.406	264.674		Het	KO	0.142	n.s.
		#3	270.688	279.192	285.779		#3	279.88	269.137	259.532		Het	cKO	0.025	*
												KO	cKO	0.652	n.s.
		average	270.622	282.917	289.732		average	269.002	273.963	264.517
		std	8.51107	4.32593	4.34722		std	11.34	7.28813	4.90819		X position	C8	Isl1
		sem	4.91387	2.49758	2.50987		sem	6.54715	4.2078	2.83374		Het	KO	> 0.9999	n.s.
												Het	cKO	> 0.9999	n.s.
												KO	cKO	0.64	n.s.
		C6: Lhx1					C8: Lhx1					One-way ANOVA post-hoc Bonferroni
		embryo No.	Het	KO	cKO		embryo No.	Het	KO	cKO
		#1	362.197	348.242	342.376		#1	342.858	328.727	317.921		X position	C6	Lhx1
		#2	367.084	345.317	319.987		#2	338.108	315.464	314.524		Het	KO	0.0393	*
		#3	368.362	342.505	325.139		#3	357.084	329.668	313.627		Het	cKO	0.0024	**
												KO	cKO	0.1003	n.s.
		average	365.881	345.355	329.167		average	346.016	324.619	315.357
		std	3.25387	2.86881	11.7257		std	9.87459	7.94317	2.26516		X position	C8	Lhx1
		sem	1.87862	1.65631	6.76982		sem	5.7011	4.58599	1.30779		Het	KO	0.037	*
												Het	cKO	0.007	**
												KO	cKO	0.533	n.s.
Figure3c
CM motor pools		CM	Het	KO	cKO		One-way ANOVA post-hoc Bonferroni
marker: Isl1+ Etv4+		#1	47.5	30.75	35.6667		Het	KO	> 0.9999	n.s.
		#2	26.25	32	32		Het	cKO	> 0.9999	n.s.
		#3	37.5	32.25	29.3333		KO	cKO	> 0.9999	n.s.
		average	37.0833	31.6667	32.3333
		std	10.6311	0.803638	3.1798
		sem	6.13788	0.46398	1.83586
LD motor pools		LD	Het	KO	cKO		One-way ANOVA post-hoc Bonferroni
marker: Isl1- Etv4+		#1	18.5	13.5	12.25		Het	KO	> 0.9999	n.s.
		#2	16.75	19	15.25		Het	cKO	> 0.9999	n.s.
		#3	12.25	16.5	16.25		KO	cKO	> 0.9999	n.s.
		average	15.8333	16.3333	14.5833
		std	3.22426	2.75379	2.08167
		sem	1.86153	1.5899	1.20185
FCU motor pools		FCU	Het	KO	cKO		One-way ANOVA post-hoc Bonferroni
marker: Foxp1+ Scip+		#1	42.5	31.5	33.5		Het	KO	0.53	n.s.
		#2	31.5	33.5	32.5		Het	cKO	0.44	n.s.
		#3	35.5	27.5	25		KO	cKO	> 0.9999	n.s.
		average	36.5	30.8333	30.3333
		std	5.56776	3.05505	4.64579
		sem	3.21455	1.76383	2.68225
