# Supplementary material for: Transcriptional control of motor pool formation and motor circuit connectivity by the LIM-HD protein Isl2
Source: eLife. 2023 Oct 23;12:e84596. doi: 10.7554/eLife.84596 (PMC10637776; doi:10.7554/eLife.84596)
Supplement: Figure 4—source data 1. — It also includes the average cell count per embryo in Etv4+ rectus femoris (Rf)/tensor fasciae latae (Tfl)/gluteus (Gl) and Nkx6.1+ Lhx1+ tibialis anterior (Ta) motor pools (Figure 4c). [file elife-84596-fig4-data1.xlsx]

## Sheet: Sheet1
Figure 4-source data 1
Figure 4b
Lhx3, Scip: V-D axis (μm)		L2: Lhx3					L4: Lhx3					One-way ANOVA post-hoc Bonferroni
		embryo No.	Het	KO	cKO		embryo No.	Het	KO	cKO
		#1	60.4406	70.5794	67.0971		#1	68.8267	73.7227	76.3036		Y position	L2	Lhx3
		#2	69.8503	63.9425	72.8927		#2	64.2686	63.6481	59.5427		Het	KO	>0.9999	ns
		#3	70.2798	73.9096	67.1242		#3	62.0433	73.9615	77.8443		Het	cKO	>0.9999	ns
												KO	cKO	>0.9999	ns
		average	66.8569	69.4772	69.038		average	65.0462	70.4441	71.2302
		std	5.56083	5.07417	3.33828		std	3.45789	5.8867	10.151		Y position	L4	Lhx3
		sem	3.21055	2.92957	1.92736		sem	1.99641	3.39869	5.86066		Het	KO	>0.9999	ns
												Het	cKO	0.9751	ns
												KO	cKO	>0.9999	ns
		L2: Scip					L4: Scip					One-way ANOVA post-hoc Bonferroni
		embryo No.	Het	KO	cKO		embryo No.	Het	KO	cKO
		#1	50.8511	74.9237	80.8302		#1	62.3917	73.704	73.453		Y position	L2	Scip (MMC)
		#2	65.9616	76.5989	67.2655		#2	62.0009	70.1151	68.0798		Het	KO	0.0739	ns
		#3	54.0563	69.1116	80.6684		#3	62.738	70.8879	72.4766		Het	cKO	0.04	*
												KO	cKO	>0.9999	ns
		average	56.9563	73.5447	76.2547		average	62.3769	71.569	71.3365
		std	7.96178	3.92948	7.78529		std	0.368759	1.88892	2.86231		Y position	L4	Scip (MMC)
		sem	4.59673	2.26869	4.49484		sem	0.212903	1.09057	1.65255		Het	KO	0.0039	**
												Het	cKO	0.0045	**
												KO	cKO	>0.9999	ns
Nkx6.1, Lhx1: M-L axis (μm)		L2: Nkx6.1					L4: Nkx6.1					One-way ANOVA post-hoc Bonferroni
		embryo No.	Het	KO	cKO		embryo No.	Het	KO	cKO
		#1	237.891	236.506	251.91		#1	241.696	248.11	251.22		Y position	L2	Nkx6.1
		#2	227.795	232.597	260.615		#2	235.538	243.028	253.986		Het	KO	>0.9999	ns
		#3	227.606	231.886	248.252		#3	238.599	241.745	243.752		Het	cKO	0.0055	**
												KO	cKO	0.0101	*
		average	231.097	233.663	253.592		average	238.611	244.294	249.653
		std	5.88397	2.48771	6.35114		std	3.07901	3.36658	5.29373		Y position	L4	Nkx6.1
		sem	3.39711	1.43628	3.66683		sem	1.77767	1.9437	3.05634		Het	KO	0.4068	ns
												Het	cKO	0.0463	*
												KO	cKO	0.4651	ns
		L2: Lhx1					L4: Lhx1					One-way ANOVA post-hoc Bonferroni
		embryo No.	Het	KO	cKO		embryo No.	Het	KO	cKO
		#1	301.777	279.572	293.037		#1	295.809	261.299	267.918		Y position	L2	Lhx1
		#2	303.871	271.833	274.637		#2	291.802	261.449	253.045		Het	KO	0.0076	**
		#3	301.188	280.821	280.97		#3	286.97	267.972	268.72		Het	cKO	0.0248	*
												KO	cKO	0.9496	ns
		average	302.279	277.409	282.881		average	291.527	263.573	263.228
		std	1.4098	4.86872	9.34759		std	4.42592	3.81021	8.82743		Y position	L4	Lhx1
		sem	0.813951	2.81096	5.39683		sem	2.55531	2.19982	5.09652		Het	KO	0.0041	**
												Het	cKO	0.0039	**
												KO	cKO	>0.9999	ns
Figure 4c
Etv4+ motor pools		embryo No.	Het	KO	cKO		One-way ANOVA post-hoc Bonferroni
		#1	22.8182	4.88889	5.6
		#2	19.75	9.75	4		Het	KO	0.0005	***
		#3	21.2	3.68182	2.25		Het	cKO	0.0003	***
							KO	cKO	0.8675	ns
		average	21.2561	6.1069	3.95
		std	1.53486	3.21222	1.67556
		sem	0.886151	1.85458	0.967385
Nkx6.1+ Lhx1+ motor pools		embryo No.	Het	KO	cKO		One-way ANOVA post-hoc Bonferroni
		#1	15.75	17	17
		#2	11.75	16.75	18.6667		Het	KO	>0.9999	ns
		#3	20.5	13	21		Het	cKO	0.8777	ns
							KO	cKO	0.705	ns
		average	16	15.5833	18.8889
		std	4.38035	2.24072	2.00924
		sem	2.529	1.29368	1.16003
