# Supplementary material for: Transcriptional control of motor pool formation and motor circuit connectivity by the LIM-HD protein Isl2
Source: eLife. 2023 Oct 23;12:e84596. doi: 10.7554/eLife.84596 (PMC10637776; doi:10.7554/eLife.84596)
Supplement: Figure 5—source data 1. [file elife-84596-fig5-data1.xlsx]

## Sheet: Sheet1
Figure 5b
qRT-PCR	Brachial	imageJ value										relative expression					ANOVA summary							Number of families	1
Brachial		Isl2 +/+			Isl2 +/-			Isl2 -/-				Isl2 +/+	Isl2 +/-	Isl2 -/-			F	1.733						Number of comparisons per family	3
WT: n = 3 embryos		Gapdh	Pea3	Pea3 / Gapdh	Gapdh	Pea3	Pea3 / Gapdh	Gapdh	Pea3	Pea3 / Gapdh		1.09489	1.03962	0.873001			P value	0.2546						Alpha	0.05
Het: n = 3 embryos		43940.5	50742	1.15479	47799.7	52411.9	1.09649	49802.6	45856.3	0.920761		0.869846	0.9809	0.716113			P value summary	ns
KO: n = 3 embryos		47486.1	43565.4	0.917435	52185.3	53989	1.03456	53746.6	40594.3	0.755291		1.03526	0.90815	0.962516			Significant diff. among means (P < 0.05)?	No						Tukey's multiple comparisons test	Mean Diff.	95.00% CI of diff.	Below threshold?	Summary	Adjusted P Value
		40653.7	44389.8	1.0919	44612.8	42731.6	0.957833	46343.1	47046.2	1.01517							R squared	0.3662						Isl2 +/+ vs. Isl2 +/-	0.02378	-0.2409 to 0.2885	No	ns	0.9593	A-B
																								Isl2 +/+ vs. Isl2 -/-	0.1495	-0.1152 to 0.4141	No	ns	0.2692	A-C
																	Brown-Forsythe test							Isl2 +/- vs. Isl2 -/-	0.1257	-0.1390 to 0.3904	No	ns	0.3736	B-C
											average	1	0.976222	0.850543			F (DFn, DFd)	0.2542 (2, 6)
											std	0.116592	0.0658575	0.124727			P value	0.7835						Test details	Mean 1	Mean 2	Mean Diff.	SE of diff.	n1	n2	q	DF
											sem	0.0673146	0.0380228	0.0720111			P value summary	ns						Isl2 +/+ vs. Isl2 +/-	1	0.9762	0.02378	0.08627	3	3	0.3898	6
																	Are SDs significantly different (P < 0.05)?	No						Isl2 +/+ vs. Isl2 -/-	1	0.8505	0.1495	0.08627	3	3	2.45	6
																								Isl2 +/- vs. Isl2 -/-	0.9762	0.8505	0.1257	0.08627	3	3	2.06	6
																	Bartlett's test
																	Bartlett's statistic (corrected)
																	P value
																	P value summary
																	Are SDs significantly different (P < 0.05)?
																	ANOVA table	SS	DF	MS	F (DFn, DFd)	P value
																	Treatment (between columns)	0.0387	2	0.01935	F (2, 6) = 1.733	P=0.2546
																	Residual (within columns)	0.06698	6	0.01116
																	Total	0.1057	8
																	Data summary
																	Number of treatments (columns)	3
																	Number of values (total)	9
Lumbar	Lumbar	imageJ value										relative expression					ANOVA summary							Number of families	1
WT: n = 6 embryos		Isl2 +/+			Isl2 +/-			Isl2 -/-				Isl2 +/+	Isl2 +/-	Isl2 -/-			F	10.85						Number of comparisons per family	3
Het: n = 8 embryos		Gapdh	Pea3	Pea3 / Gapdh	Gapdh	Pea3	Pea3 / Gapdh	Gapdh	Pea3	Pea3 / Gapdh		1.05351	0.720305	0.431683			P value	0.0008						Alpha	0.05
KO: n = 7 embryos		68254.8	59820.8	0.876434	71606.1	42908.8	0.599234	74374.8	26709.8	0.359125		0.948641	0.951855	0.835316			P value summary	***
		75462.2	59554	0.78919	77230	61155.7	0.791865	71440.7	49645.1	0.694913		1.07083	1.19738	0.466341			Significant diff. among means (P < 0.05)?	Yes						Tukey's multiple comparisons test	Mean Diff.	95.00% CI of diff.	Below threshold?	Summary	Adjusted P Value
		47454	42274	0.890842	73741.8	73456	0.996123	46464.7	18026.3	0.387957		1.32542	1.17689	0.744872			R squared	0.5465						Isl2 +/+ vs. Isl2 +/-	0.04109	-0.2379 to 0.3201	No	ns	0.9254	A-B
		60986.4	67245.8	1.10264	45312.7	44364.6	0.979076	47279	29297.4	0.619672		0.894968	1.20387	0.566493										Isl2 +/+ vs. Isl2 -/-	0.4585	0.1711 to 0.7459	Yes	**	0.002	A-C
		51572.3	38397.6	0.744539	48549.3	48623.2	1.00152	67528.7	31824.6	0.471275		0.706633	0.947175	0.367897			Brown-Forsythe test							Isl2 +/- vs. Isl2 -/-	0.4174	0.1500 to 0.6847	Yes	**	0.0024	B-C
		55387.6	32560.1	0.58786	65175.7	51356.6	0.787971	51330.4	15710.2	0.30606			0.759274	0.378073			F (DFn, DFd)	0.1628 (2, 18)
					53526.9	33810.4	0.631653	54752	17220.9	0.314525			0.714495				P value	0.851						Test details	Mean 1	Mean 2	Mean Diff.	SE of diff.	n1	n2	q	DF
					55453	32961.3	0.594401										P value summary	ns						Isl2 +/+ vs. Isl2 +/-	1	0.9589	0.04109	0.1093	6	8	0.5316	18
																	Are SDs significantly different (P < 0.05)?	No						Isl2 +/+ vs. Isl2 -/-	1	0.5415	0.4585	0.1126	6	7	5.758	18
																								Isl2 +/- vs. Isl2 -/-	0.9589	0.5415	0.4174	0.1048	8	7	5.635	18
											average	1	0.958907	0.541525			Bartlett's test
											std	0.206645	0.214178	0.183878			Bartlett's statistic (corrected)	0.1438
											sem	0.0843623	0.0757234	0.0694995			P value	0.9306
																	P value summary	ns
																	Are SDs significantly different (P < 0.05)?	No
																	ANOVA table	SS	DF	MS	F (DFn, DFd)	P value
																	Treatment (between columns)	0.8888	2	0.4444	F (2, 18) = 10.85	P=0.0008
																	Residual (within columns)	0.7375	18	0.04097
																	Total	1.626	20
																	Data summary
																	Number of treatments (columns)	3
																	Number of values (total)	21
