# Supplementary material for: Transcriptional control of motor pool formation and motor circuit connectivity by the LIM-HD protein Isl2
Source: eLife. 2023 Oct 23;12:e84596. doi: 10.7554/eLife.84596 (PMC10637776; doi:10.7554/eLife.84596)
Supplement: Figure 5—source data 2. [file elife-84596-fig5-data2.xlsx]

## Sheet: Sheet1
Figure 5-source data 2
Figure 5c
# of MNR2+ cells	embryo No.	Con	embryo No.	Isl2 siRNA		Unpaired t test
marker: MNR2	#1	88	#1	86.6		P value	0.9622
	#2	145.75	#2	149.25		P value summary	ns
	#3	70	#3	66.4		Significantly different? (P < 0.05)	No
	#4	79.25	#4	75.75		One- or two-tailed P value?	Two-tailed
	average	95.75	average	94.5		t, df	t=0.04936 df=6
	std	34.1339	std	37.4217
	sem	17.067	sem	18.7108		How big is the difference?
						Mean ± SEM of column A	95.75 ± 17.07
						Mean ± SEM of column B	94.50 ± 18.71
						Difference between means	-1.250 ± 25.33
						95% confidence interval	-63.22 to 60.72
						R square	0.0004059
						F test to compare variances
						F,DFn, Dfd	1.202, 3, 3
						P value	0.8834
						P value summary	ns
						Significantly different? (P < 0.05)	No
						Data analyzed
						Sample size, column A	4
						Sample size, column B	4
Intensity of Isl2 quantification	embryo No.	Con	embryo No.	Isl2 siRNA		Unpaired t test
marker: Isl2	#1	1	#1	0.813858		P value	0.0008
	#2	1	#2	0.567297		P value summary	***
	#3	1	#3	0.6097		Significantly different? (P < 0.05)	Yes
	#4	1	#4	0.591084		One- or two-tailed P value?	Two-tailed
	average	1	average	0.645485		t, df	t=6.242 df=6
	std	0	std	0.113582
	sem	0	sem	0.0567912		How big is the difference?
						Mean ± SEM of column A	1.000 ± 0.0
						Mean ± SEM of column B	0.6455 ± 0.05679
						Difference between means	-0.3545 ± 0.05679
						95% confidence interval	-0.4935 to -0.2156
						R square	0.8666
						F test to compare variances
						F,DFn, Dfd
						P value
						P value summary
						Significantly different? (P < 0.05)
						Data analyzed
						Sample size, column A	4
						Sample size, column B	4
Intensity of ETV4 quantification	embryo No.	Con	embryo No.	Isl2 siRNA		Unpaired t test
marker: ETV4	#1	1	#1	0.15316		P value	< 0.0001
	#2	1	#2	0.130562		P value summary	****
	#3	1	#3	0.1209		Significantly different? (P < 0.05)	Yes
	average	1	average	0.134874		One- or two-tailed P value?	Two-tailed
	std	0	std	0.0165565		t, df	t=90.50 df=4
	sem	0	sem	0.00955892
						How big is the difference?
						Mean ± SEM of column A	1.000 ± 0.0
						Mean ± SEM of column B	0.1349 ± 0.009559
						Difference between means	-0.8651 ± 0.009559
						95% confidence interval	-0.8917 to -0.8386
						R square	0.9995
						F test to compare variances
						F,DFn, Dfd
						P value
						P value summary
						Significantly different? (P < 0.05)
						Data analyzed
						Sample size, column A	3
						Sample size, column B	3
Intensity of ALDH1A2 quantification	embryo No.	Con	embryo No.	Isl2 siRNA		Unpaired t test
marker: ALDH1A2	#1	1	#1	1.04791		P value	0.334
	#2	1	#2	0.75171		P value summary	ns
	#3	1	#3	0.753003		Significantly different? (P < 0.05)	No
	average	1	average	0.850875		One- or two-tailed P value?	Two-tailed
	std	0	std	0.17064		t, df	t=1.514 df=4
	sem	0	sem	0.098519
						How big is the difference?
						Mean ± SEM of column A	1.000 ± 0.0
						Mean ± SEM of column B	0.8509 ± 0.09852
						Difference between means	-0.1491 ± 0.09852
						95% confidence interval	-0.4227 to 0.1244
						R square	0.3642
						F test to compare variances
						F,DFn, Dfd
						P value
						P value summary
						Significantly different? (P < 0.05)
						Data analyzed
						Sample size, column A	3
						Sample size, column B	3
