# Supplementary material for: Transcriptional control of motor pool formation and motor circuit connectivity by the LIM-HD protein Isl2
Source: eLife. 2023 Oct 23;12:e84596. doi: 10.7554/eLife.84596 (PMC10637776; doi:10.7554/eLife.84596)
Supplement: Figure 7—source data 1. [file elife-84596-fig7-data1.xlsx]

## Sheet: Sheet1
Figure 7-source data 1
Figure 7b			mouse No.	Het	KO		Unpaired t test results
Average number of ChAT+ MNs			#1	27.2941	28.3077		P value and statistical significance:
			#2	30.4615	30.25		The two-tailed P value equals 0.3463
			#3	28.2727	32		By conventional criteria, this difference is considered to be not statistically significant.
							Confidence interval:
			average	28.6761	30.1859		The mean of Het minus KO equals -1.5133
			std	1.62179	1.84699		95% confidence interval of this difference: From -5.4533 to 2.4266
			sem	0.936338	1.06636		Intermediate values used in calculations:
							t = 1.0664
							df = 4
							standard error of difference = 1.419
