# Supplementary material for: Transcriptional control of motor pool formation and motor circuit connectivity by the LIM-HD protein Isl2
Source: eLife. 2023 Oct 23;12:e84596. doi: 10.7554/eLife.84596 (PMC10637776; doi:10.7554/eLife.84596)
Supplement: Figure 7—source data 2. [file elife-84596-fig7-data2.xlsx]

## Sheet: Sheet1
Figure 7-source data 2
Figure 7f-g			Isl2 +/-	Isl2 -/-
M-L axis (μm)			579.944	432.603
			598.536	361.183
			639.318	294.524
			657.31	362.176
			601.199	368.396
			647.306	443.043
			666.468	509.396
			613.905	539.808
			604.965	534.278
			657.415	339.169
			643.111	439.348
			682.448	468.158
			681.256	491.73
			626.829	517.92
			641.275	330.19
			704.083	341.283
			696.761	530.522
			732.158	310.104
			630.314	334.413
			619.136	508.49
			733.305	469.528
			676.411	423.302
			698.249	362.547
			723.535	461.991
			668.365	455.912
			651.124	445.105
			685.17	378.913
			598.432	356.725
			607.828	365.475
			631.929	583.63
			584.902	564.745
			653.092	623.229
			680.132	588.657
			675.43	616.888
			540.478	640.332
			592.493	575.466
			635.54	599.196
			556.69	540.603
			572.017	459.513
			612.482	683.953
			665.208	418.982
			672.565	290.438
			611.255	314.405
				586.827
				399.402
				482.989
				673.313
				424.714
				444.248
				489.618
				679.92
				621.947
				563.974
				451.957
				362.512
				323.304
				342.587
				422.288
				409.433
				390.886
				405.92
				364.086
		average	643.032	459.939		Unpaired t test results
		std	46.0426	106.19		P value	0.0001	***
		sem	7.02143	13.4861
Figure 7h			zone 1		zone 2			Unpaired t test results
vGluT1 intensity			Isl2 +/-	Isl2 -/-	Isl2 +/-	Isl2 -/-		zone 1	Isl2 +/- vs. Isl2 -/-	p = 0.9057	n.s.
			12.191	11.946	6.653	7.046		zone 2	Isl2 +/- vs. Isl2 -/-	p = 0.4538	n.s.
			11.383	12.184	6.18	6.94
			14.148	12.582	8.418	7.908
			13.277	13.961	6.585	7.912
			11.975	11.393	6.971	5.262
			19.392	17.435	11.45	11.306
			20.433	17.318	11.387	11.626
			20.207	29.377	12.456	18.017
			19.956	18.589	10.37	11.861
			19.719	20.476	8.815	12.09
		average	16.2681	16.5261	8.9285	9.9968
		std	3.95093	5.52541	2.33934	3.73761
		sem	1.24939	1.74729	0.739766	1.18194
Figure 7j-k		Isl2 +/-
		No.	x (in um)	vGluT1 #				Unpaired t test results
		1	599.78	13				Figure 7j	Isl2 +/- vs. Isl2 -/-	p = 0.0002	***
		2	581.955	7
		3	634.487	13					Isl2 +/-	Isl2 -/-
		4	605.477	9				average	12.4286	6.42105
		5	608.132	6				std	4.5525	3.45311
		6	612.775	6				sem	1.21671	0.792198
		7	674.255	15
		8	646.379	7				One-way ANOVA and Tukey's post hoc tests
		9	587.179	14				Figure 7k	Isl2 +/- (zone 1)	Isl2 -/- (zone 1)	p-adj	0.1488	n.s.
		10	651.553	18					Isl2 +/- (zone 1)	Isl2 -/- (zone 2)	p-adj	<0.0001	****
		11	653.434	17					Isl2 -/- (zone 1)	Isl2 -/- (zone 2)	p-adj	0.0062	**
		12	584.22	17
		13	667.232	18
		14	703.665	14
			Bin (um)	average	std	sem
		Zone 2	250 ~ 500	0	0	0
		Zone 1	501 ~ 750	12.4286	4.5525	1.21671
		Isl2 -/-
		No.	x (in um)	vGluT1 #
		1	704.411	6
		2	611.988	10
		3	673.492	8
		4	581.205	11
		5	610.256	7
		6	339.107	3
		7	477.999	4
		8	312.062	5
		9	629.247	15
		10	492.959	1
		11	648.677	8
		12	588.003	11
		13	457.635	6
		14	416.051	5
		15	312.072	5
		16	403.698	2
		17	485.199	4
		18	394.822	5
		19	366.666	6
			Bin (um)	average	std	sem
		Zone 2	250 ~ 500	4.18182	1.60114	0.482761
		Zone 1	501 ~ 750	9.5	2.87849	1.0177
