# Supplementary material for: Transcriptional control of motor pool formation and motor circuit connectivity by the LIM-HD protein Isl2
Source: eLife. 2023 Oct 23;12:e84596. doi: 10.7554/eLife.84596 (PMC10637776; doi:10.7554/eLife.84596)
Supplement: Figure 8—source data 1. [file elife-84596-fig8-data1.xlsx]

## Sheet: Sheet1
Figure 8-source data 1
Figure 8b			Cnt	KO		Unpaired t test
# of NMJs (P0)			962	768		P value	0.0257
			956	745		P value summary	*
			870	893		Significantly different (P < 0.05)?	Yes
			889	683		One- or two-tailed P value?	Two-tailed
						t, df	t=2.949, df=6
		average	919.25	772.25
		std	46.6146	88.1415		How big is the difference?
		sem	23.3073	44.0707		Mean of column A	919.3
						Mean of column B	772.3
						Difference between means (B - A) ± SEM	-147.0 ± 49.85
						95% confidence interval	-269.0 to -25.01
						R squared (eta squared)	0.5917
						F test to compare variances
						F, DFn, Dfd	3.575, 3, 3
						P value	0.3232
						P value summary	ns
						Significantly different (P < 0.05)?	No
						Data analyzed
						Sample size, column A	4
						Sample size, column B	4
Figure 8c			Cnt	KO		Unpaired t test				Cnt	KO
Length of secondary branches (P0)			122.565	43.29		P value	<0.0001		average	312.841	91.551
			240	188.586		P value summary	****		std	182.872	79.0945
			84.5475	52.0338		Significantly different (P < 0.05)?	Yes		sem	16.6939	8.3373
			91.905	144.727		One- or two-tailed P value?	Two-tailed
			437.525	202.602		t, df	t=10.75, df=208
			227.74	45.0838
			118.216	32.8038		How big is the difference?
			134.61	33.6187		Mean of column A	312.8
			113.701	50.6213		Mean of column B	91.55
			175.17	120.634		Difference between means (B - A) ± SEM	-221.3 ± 20.59
			117.909	144.197		95% confidence interval	-261.9 to -180.7
			425.984	97.0363		R squared (eta squared)	0.357
			156.525	135.575
			139.72	71.8487		F test to compare variances
			400.421	30.735		F, DFn, Dfd	5.346, 119, 89
			152.095	60.6562		P value	<0.0001
			407.16	49.635		P value summary	****
			156.243	56.1337		Significantly different (P < 0.05)?	Yes
			390.782	67.7288
			190.586	269.59		Data analyzed
			625.239	14.635		Sample size, column A	120
			410.917	27.74		Sample size, column B	90
			85.305	141.724
			67.1225	109.767
			547.777	54.2875
			470.367	34.445
			156.04	54.93
			142.308	59.9075
			621.381	213.143
			146.006	142.118
			630.735	50.67
			414.098	35.035
			635.386	44.1775
			477.796	56.585
			323.315	46.695
			180.502	24.2475
			189.873	30.4738
			244.874	38.6575
			621.156	27.4075
			419.072	67.175
			414.245	49.9175
			137.775	51.8287
			382.382	238.642
			123.968	166.34
			485.08	112.245
			427.192	116.359
			270.159	98.205
			193.866	192.186
			393.44	40.1788
			997.577	41.6887
			380.835	17.5
			102.677	44.8375
			86.99	38.68
			95.7837	49.93
			66.6875	102.507
			484.866	241.07
			711.889	331.839
			297.056	445.337
			220.499	58.975
			81.41	127.66
			334.525	25.1262
			277.226	54.4725
			345.373	29.955
			526.86	74.6287
			93.3563	55.7225
			317.153	39.8375
			282.158	56.9725
			883.736	107.714
			289.357	53.3387
			156.148	52.06
			186.25	30.885
			224.267	102.03
			274.192	41.0412
			171.209	66.5562
			238.394	306.392
			575.325	312.856
			417.275	110.971
			542.929	72.3612
			193	67.8588
			233.569	92.8813
			168.035	45.4975
			227.286	32.3612
			227.643	30.9262
			622.562	165.102
			166.041	65.4737
			222.062	121.701
			245.138	61.1575
			309.028	81.4288
			117.891	103.697
			204.273	41.7012
			399.55
			322.219
			737.421
			423.868
			166.306
			583.775
			165.38
			619.357
			263.223
			281.499
			670.189
			296.666
			202.435
			450.581
			245.096
			308.082
			408.768
			340.491
			208.085
			235.938
			419.837
			376.793
			381.053
			251.43
			408.491
			388.444
			259.059
			256.225
			163.076
			188.274
Figure 8d			Cnt	KO		Unpaired t test				Cnt	KO
Endplate band area (axon) (P0)			1.62185e+06	1.00912e+06		P value	0.0014		average	1.66456e+06	919622
			1.40676e+06	1.04879e+06		P value summary	**		std	301941	123327
			1.53191e+06	751353		Significantly different (P < 0.05)?	Yes		sem	150971	55153.5
			2.09772e+06	837152		One- or two-tailed P value?	Two-tailed
				951697		t, df	t=5.081, df=7
						How big is the difference?
						Mean of column A	1664562
						Mean of column B	919622
						Difference between means (B - A) ± SEM	-744940 ± 146607
						95% confidence interval	-1091610 to -398270
						R squared (eta squared)	0.7867
						F test to compare variances
						F, DFn, Dfd	5.994, 3, 4
						P value	0.1164
						P value summary	ns
						Significantly different (P < 0.05)?	No
						Data analyzed
						Sample size, column A	4
						Sample size, column B	5
Figure 8e			Cnt	KO		Unpaired t test				Cnt	KO
Endplate band area (AChR) (P0)			1.08034e+06	561261		P value	0.0005		average	1.04016e+06	607106
			1.1717e+06	582230		P value summary	***		std	105928	106870
			954564	487475		Significantly different (P < 0.05)?	Yes		sem	52964.2	47793.5
			954034	629702		One- or two-tailed P value?	Two-tailed
				774861		t, df	t=6.063, df=7
						How big is the difference?
						Mean of column A	1040161
						Mean of column B	607106
						Difference between means (B - A) ± SEM	-433055 ± 71420
						95% confidence interval	-601938 to -264173
						R squared (eta squared)	0.8401
						F test to compare variances
						F, DFn, Dfd	1.018, 4, 3
						P value
						P value summary
						Significantly different (P < 0.05)?	No
						Data analyzed
						Sample size, column A	4
						Sample size, column B	5
Figure 8f			Isl2 +/-	Isl2 -/-		Unpaired t test				Isl2 +/-	Isl2 -/-
# of NMJs (P14)			829	124		P value	<0.0001		average	828.25	104
			951	88		P value summary	****		std	90.4705	35.1473
			797	63		Significantly different (P < 0.05)?	Yes		sem	45.2353	17.5737
			736	141		One- or two-tailed P value?	Two-tailed
						t, df	t=14.92, df=6
						How big is the difference?
						Mean of column A	828.3
						Mean of column B	104
						Difference between means (B - A) ± SEM	-724.3 ± 48.53
						95% confidence interval	-843.0 to -605.5
						R squared (eta squared)	0.9738
						F test to compare variances
						F, DFn, Dfd	6.626, 3, 3
						P value	0.1547
						P value summary	ns
						Significantly different (P < 0.05)?	No
						Data analyzed
						Sample size, column A	4
						Sample size, column B	4
Figure 8g			Isl2 +/-	Isl2 -/-		Mann Whitney test				Isl2 +/-	Isl2 -/-
# of overshooting axons / 100 μm endplate (P14)			1	7		P value	<0.0001		average	0.26087	3.92308
			0	4		Exact or approximate P value?	Exact		std	0.443961	1.81202
			0	5		P value summary	****		sem	0.0654585	0.290155
			0	3		Significantly different (P < 0.05)?	Yes
			1	3		One- or two-tailed P value?	Two-tailed
			0	6		Sum of ranks in column A,B	1134 , 2521
			1	5		Mann-Whitney U	53
			0	5
			0	6		Difference between medians
			0	6		Median of column A	0.000, n=46
			0	5		Median of column B	4.000, n=39
			1	4		Difference: Actual	4
			1	4		Difference: Hodges-Lehmann	4
			1	4
			0	1
			0	2
			1	1
			1	1
			0	3
			0	0
			0	1
			1	2
			0	4
			0	5
			0	3
			0	3
			0	3
			0	4
			0	4
			0	3
			0	5
			1	4
			1	6
			0	6
			0	3
			0	6
			0	8
			0	5
			0	3
			0
			0
			0
			1
			0
			0
			0
Figure 8l			Isl2 +/-	Isl2 -/-		Mann Whitney test				Isl2 +/-	Isl2 -/-
% of faint NMJs (P14)			1.5873	50		P value	<0.0001		average	1.12144	70.4668
			0	68.9655		Exact or approximate P value?	Exact		std	1.96751	12.8894
			3.94737	85.7143		P value summary	****		sem	0.477192	3.22234
			2.30769	58.3333		Significantly different (P < 0.05)?	Yes
			2.5641	100		One- or two-tailed P value?	Two-tailed
			0	65.3061		Sum of ranks in column A,B	153 , 408
			1.51515	65.9574		Mann-Whitney U	0
			7.14286	76.4706
			0	78.9474		Difference between medians
			0	80.9524		Median of column A	0.000, n=17
			0	48.1481		Median of column B	70.04, n=16
			0	73.913		Difference: Actual	70.04
			0	65.2174		Difference: Hodges-Lehmann	68.97
			0	71.7647
			0	66.6667
			0	71.1111
			0
Figure 8m			Isl2 +/-	Isl2 -/-		Mann Whitney test				Isl2 +/-	Isl2 -/-
% of poly-innervated NMJs (P14)			1.5873	26.5306		P value	<0.0001		average	0.806566	18.4854
			2.77778	14.8936		Exact or approximate P value?	Exact		std	1.0553	7.76495
			1.31579	21.4286		P value summary	****		sem	0.255949	2.74532
			0	31.4815		Significantly different (P < 0.05)?	Yes
			0	10.8696		One- or two-tailed P value?	Two-tailed
			2.43902	8.23529		Sum of ranks in column A,B	153 , 172
			0	16.6667		Mann-Whitney U	0
			1.42857	17.7778
			0			Difference between medians
			0			Median of column A	0.000, n=17
			2.43902			Median of column B	17.23, n=8
			1.72414			Difference: Actual	17.23
			0			Difference: Hodges-Lehmann	16.67
			0
			0
			0
			0
Figure 8n			Isl2 +/-	Isl2 -/-		Mann Whitney test				Isl2 +/-	Isl2 -/-
# of axonal inputs (P14)			1	3		P value	<0.0001		average	1.04545	3.90909
			1	5		Exact or approximate P value?	Exact		std	0.213201	0.831209
			1	5		P value summary	****		sem	0.0454545	0.250619
			1	4		Significantly different (P < 0.05)?	Yes
			1	3		One- or two-tailed P value?	Two-tailed
			1	4		Sum of ranks in column A,B	253 , 308
			1	4		Mann-Whitney U	0
			1	4
			1	3		Difference between medians
			1	5		Median of column A	1.000, n=22
			1	3		Median of column B	4.000, n=11
			2			Difference: Actual	3
			1			Difference: Hodges-Lehmann	3
			1
			1
			1
			1
			1
			1
			1
			1
			1
Figure 8o			Nerve terminal area			Unpaired t test				Isl2 +/-	Isl2 -/-
Nerve terminal area, AChR cluter area (P14)			Isl2 +/-	Isl2 -/-		P value	<0.0001		average	269.613	695.627
			274.428	426.295		P value summary	****		std	46.6101	208.35
			239.761	550.986		Significantly different (P < 0.05)?	Yes		sem	9.93731	62.82
			218.78	1062.69		One- or two-tailed P value?	Two-tailed
			227.286	694.758		t, df	t=9.274, df=31
			261.251	653.291
			312.773	1067.5		How big is the difference?
			233.929	476.377		Mean of column A	269.6
			259.711	790.67		Mean of column B	695.6
			227.991	644.866		Difference between means (B - A) ± SEM	426.0 ± 45.94
			408.674	656.97		95% confidence interval	332.3 to 519.7
			283.965	627.489		R squared (eta squared)	0.7351
			315.94
			242.565			F test to compare variances
			253.097			F, DFn, Dfd	19.98, 10, 21
			237.284			P value	<0.0001
			290.129			P value summary	****
			273.218			Significantly different (P < 0.05)?	Yes
			358.426
			254.088			Data analyzed
			226.827			Sample size, column A	22
			289.48			Sample size, column B	11
			241.891
			AChR cluster area			Unpaired t test				Isl2 +/-	Isl2 -/-
			Isl2 +/-	Isl2 -/-		P value	<0.0001		average	357.12	700.921
			376.032	340.53		P value summary	****		std	49.5961	187.936
			297.224	668.307		Significantly different (P < 0.05)?	Yes		sem	10.5739	56.6648
			390.927	1002.47		One- or two-tailed P value?	Two-tailed
			299.777	729.533		t, df	t=8.147, df=31
			329.531	718.038
			376.685	928.905		How big is the difference?
			286.383	490.933		Mean of column A	357.1
			335.416	860.684		Mean of column B	700.9
			303.797	699.314		Difference between means (B - A) ± SEM	343.8 ± 42.20
			472.268	628.495		95% confidence interval	257.7 to 429.9
			321.492	642.915		R squared (eta squared)	0.6816
			415.164
			337.677			F test to compare variances
			353.173			F, DFn, Dfd	14.36, 10, 21
			336.562			P value	<0.0001
			365.06			P value summary	****
			388.785			Significantly different (P < 0.05)?	Yes
			455.783
			370.212			Data analyzed
			358.39			Sample size, column A	22
			299.911			Sample size, column B	11
			386.401
Figure 8p			Isl2 +/-	Isl2 -/-		Mann Whitney test				Isl2 +/-	Isl2 -/-
# of denervated NMJs (P14)			0	0		P value	<0.0001		average	0.0773994	4.954
			0	6.89655		Exact or approximate P value?	Exact		std	0.319126	4.15549
			1.31579	9.52381		P value summary	****		sem	0.0773994	1.03887
			0	0		Significantly different (P < 0.05)?	Yes
			0	0		One- or two-tailed P value?	Two-tailed
			0	4.08163		Sum of ranks in column A,B	189 , 372
			0	6.38298		Mann-Whitney U	36
			0	5.88235
			0	0		Difference between medians
			0	2.38095		Median of column A	0.000, n=17
			0	1.85185		Median of column B	5.115, n=16
			0	6.52174		Difference: Actual	5.115
			0	4.34783		Difference: Hodges-Lehmann	4.455
			0	11.7647
			0	12.963
			0	6.66667
			0
Figure 8q			Isl2 +/-	Isl2 -/-		Mann Whitney test				Isl2 +/-	Isl2 -/-
Compactness			89.8959	44.8686		P value	<0.0001		average	81.783	55.5214
			84.1377	60.5289		Exact or approximate P value?	Exact		std	6.73828	7.69956
			91.6981	48.0157		P value summary	****		sem	1.07899	1.98802
			90.3834	54.5793		Significantly different (P < 0.05)?	Yes
			84.1231	65.8099		One- or two-tailed P value?	Two-tailed
			84.4666	50.7793		Sum of ranks in column A,B	1360 , 125
			80.1192	44.6021		Mann-Whitney U	5
			83.8668	48.5605
			87.1429	67.1231		Difference between medians
			84.3254	61.7363		Median of column A	83.70, n=39
			83.1831	53.2585		Median of column B	53.30, n=15
			86.3885	64.072		Difference: Actual	-30.4
			85.0265	51.9319		Difference: Hodges-Lehmann	-26.3
			87.6971	63.7852
			81.5128	53.1704
			86.4576
			87.3861
			83.7309
			89.8033
			86.7956
			88.7306
			89.4234
			80.4835
			75.6165
			74.0428
			79.0796
			73.1637
			63.2393
			81.9377
			86.3094
			83.4064
			78.2065
			77.2953
			77.4636
			77.4467
			70.646
			72.7009
			66.0248
			76.1794
Figure 8r			Isl2 +/-	Isl2 -/-		Mann Whitney test				Isl2 +/-	Isl2 -/-
Fragmentation			0	0.916667		P value	<0.0001		average	0.0589744	0.778552
			0	0.8		Exact or approximate P value?	Exact		std	0.181685	0.249904
			0	0.666667		P value summary	****		sem	0.0290929	0.064525
			0	0.947368		Significantly different (P < 0.05)?	Yes
			0	0.5		One- or two-tailed P value?	Two-tailed
			0	0.916667		Sum of ranks in column A,B	806.5 , 678.5
			0	0.916667		Mann-Whitney U	26.5
			0	0.888889
			0	0.875		Difference between medians
			0	0.909091		Median of column A	0.000, n=39
			0	0.857143		Median of column B	0.8900, n=15
			0	0.666667		Difference: Actual	0.89
			0	0.888889		Difference: Hodges-Lehmann	0.88
			0	0
			0	0.928571
			0
			0
			0
			0
			0.5
			0
			0
			0
			0
			0
			0.5
			0
			0.8
			0
			0
			0
			0
			0
			0
			0.5
			0
			0
			0
			0
