# Supplementary material for: Transcriptional control of motor pool formation and motor circuit connectivity by the LIM-HD protein Isl2
Source: eLife. 2023 Oct 23;12:e84596. doi: 10.7554/eLife.84596 (PMC10637776; doi:10.7554/eLife.84596)
Supplement: Figure 8—source data 2. [file elife-84596-fig8-data2.xlsx]

## Sheet: Sheet1
Figure 8-source data 2
Figure 8i			Isl2 +/-	Isl2 -/-		Unpaired t test results
# of NMJs in Tfl (P14)			247	47		two-tailed P value	0.0002	***
			410	25
			296	32
			342	33
		average	323.75	34.25
		std	69.3608	9.21502
		sem	34.6804	4.60751
Figure 8j			Isl2 +/-	Isl2 -/-		Mann Whitney test
# of axonal inputs in Tfl			2	4		P value	<0.0001	****
			1	3
			1	4
			1	3
			1	3
			1	5
			1	3
			1	7
			1	5
			1	5
			1	2
				3
				6
		average	1.09091	4.07692
		std	0.301511	1.44115
		sem	0.0909091	0.399704
