# Supplementary material for: Transcriptional control of motor pool formation and motor circuit connectivity by the LIM-HD protein Isl2
Source: eLife. 2023 Oct 23;12:e84596. doi: 10.7554/eLife.84596 (PMC10637776; doi:10.7554/eLife.84596)
Supplement: Figure 9—figure supplement 1—source data 1. [file elife-84596-fig9-figsupp1-data1.xlsx]

## Sheet: Sheet1
Figure 9-figure supplement 1-source data 1
Figure 9-figure supplement 1b
Tibia length (unit: mm)		WT	KO						Unpaired t test
		18.1773	18.3153			P value	0.1812		P value	0.1812
		18.016	16.977						P value summary	ns
		18.402	17.249						Significantly different (P < 0.05)?	No
									One- or two-tailed P value?	Two-tailed
		18.1984	17.5138	average					t, df	t=1.617, df=4
		0.193864	0.707364	std
		0.111927	0.408397	sem
