# Supplementary material for: Transcriptional control of motor pool formation and motor circuit connectivity by the LIM-HD protein Isl2
Source: eLife. 2023 Oct 23;12:e84596. doi: 10.7554/eLife.84596 (PMC10637776; doi:10.7554/eLife.84596)
Supplement: Figure 9—source data 1. — Measurement of body and muscle weight of the gluteus and rectus femoris muscles of Isl2 +/- and Isl2 KO mice for Figure 9e. [file elife-84596-fig9-data1.xlsx]

## Sheet: Sheet1
Figure 9c
Footprint analysis	Forelimb width					Unpaired t test				Isl2 +/-	Isl2 -/-
	Mouse No.	Isl2 +/-	Mouse No.	Isl2 -/-		P value	0.0782		average	1.564	1.72703
	#1	1.5	#1	1.9		P value summary	ns		std	0.31607	0.373161
		1.1		1.6		Significantly different (P < 0.05)?	No		sem	0.0632139	0.0613473
		1.4		1.8		One- or two-tailed P value?	Two-tailed
		1.3		2.3		t, df	t=1.792, df=60
	#2	1.3	#2	1.4
		1.9		2		How big is the difference?
		1.2		0.9		Mean of column A	1.564
		1.7		1.8		Mean of column B	1.727
		1.3		1.7		Difference between means (B - A) ± SEM	0.1630 ± 0.09099
	#3	1	#3	1.7		95% confidence interval	-0.01897 to 0.3450
		1.8		1.8		R squared (eta squared)	0.05079
		1.6		1.8
		1.4		1.5		F test to compare variances
		1.6		2.1		F, DFn, Dfd	1.394, 36, 24
		1.4	#4	1.8		P value	0.3969
	#4	1.2		1.5		P value summary	ns
		1.6		1.1		Significantly different (P < 0.05)?	No
		1.9		2.2
		1.8	#5	2.3		Data analyzed
		1.7		1.6		Sample size, column A	25
	#5	2.2		2.1		Sample size, column B	37
		1.5		2.3
		1.6	#6	1.8
		2.2		1.6
		1.9		1.1
				1.4
				2.7
			#7	1.3
				1.9
				1.6
				1.5
				1.6
			#8	2
				1.7
				1.5
				1.7
				1.3
	Hindlimb width					Unpaired t test				Isl2 +/-	Isl2 -/-
	Mouse No.	Isl2 +/-	Mouse No.	Isl2 -/-		P value	<0.0001		average	2.69583	3.62564
	#1	3.1	#1	3.9		P value summary	****		std	0.267808	0.53642
		2.4		4.2		Significantly different (P < 0.05)?	Yes		sem	0.054666	0.0858959
		2.5		3.7		One- or two-tailed P value?	Two-tailed
		2.8		4.1		t, df	t=7.891, df=61
	#2	2.6		3.6
		2.9	#2	3.2		How big is the difference?
		2.6		3.7		Mean of column A	2.696
		2.9		3		Mean of column B	3.626
	#3	2.5		3.8		Difference between means (B - A) ± SEM	0.9298 ± 0.1178
		2.9		3.3		95% confidence interval	0.6942 to 1.165
		2.9	#3	4.2		R squared (eta squared)	0.5051
		2.8		4.1
		3.1		3.7		F test to compare variances
		2.8		4.3		F, DFn, Dfd	4.012, 38, 23
	#4	2.8		4.2		P value	0.0008
		2.3	#4	4.1		P value summary	***
		2.5		3.6		Significantly different (P < 0.05)?	Yes
		2.8		3.7
		3		3.1		Data analyzed
	#5	2.1		4		Sample size, column A	24
		2.2	#5	4.5		Sample size, column B	39
		2.8		3.9
		2.6		4.2
		2.8		4.3
			#6	2.6
				2.9
				2.4
				2.9
				4.1
			#7	3
				3.4
				3
				3
				2.8
			#8	4
				3.7
				3.6
				3.9
				3.7
Figure 9e
Muscle weight			Whole body (unit: g)			Unpaired t test				Isl2 +/-	Isl2 -/-
			Isl2 +/-	Isl2 -/-		P value	0.0339		average	9.9	6.9
			9.6	5.2		P value summary	*		std	1.7161	1.67929
			8.9	7.2		Significantly different (P < 0.05)?	Yes		sem	0.767463	0.839643
			8.7	6.1		One- or two-tailed P value?	Two-tailed
			9.4	9.1		t, df	t=2.630, df=7
			12.9
						How big is the difference?
						Mean of column A	9.9
						Mean of column B	6.9
						Difference between means (B - A) ± SEM	-3.000 ± 1.141
						95% confidence interval	-5.697 to -0.3027
						R squared (eta squared)	0.497
						F test to compare variances
						F, DFn, Dfd	1.044, 4, 3
						P value
						P value summary
						Significantly different (P < 0.05)?	No
						Data analyzed
						Sample size, column A	5
						Sample size, column B	4
			Gluteus muscle (unit: g)			Unpaired t test				Isl2 +/-	Isl2 -/-
			Isl2 +/-	Isl2 -/-		P value	0.0316		average	0.06755	0.0343
			0.1167	0.0392		P value summary	*		std	0.0284623	0.00609631
			0.046	0.0241		Significantly different (P < 0.05)?	Yes		sem	0.0116197	0.00272635
			0.046	0.0339		One- or two-tailed P value?	Two-tailed
			0.0488	0.0386		t, df	t=2.542, df=9
			0.0856	0.0357
			0.0622			How big is the difference?
						Mean of column A	0.06755
						Mean of column B	0.0343
						Difference between means (B - A) ± SEM	-0.03325 ± 0.01308
						95% confidence interval	-0.06284 to -0.003662
						R squared (eta squared)	0.4179
						F test to compare variances
						F, DFn, Dfd	21.80, 5, 4
						P value	0.0106
						P value summary	*
						Significantly different (P < 0.05)?	Yes
						Data analyzed
						Sample size, column A	6
						Sample size, column B	5
			Rectus femoris (unit: g)			Unpaired t test				Isl2 +/-	Isl2 -/-
			Isl2 +/-	Isl2 -/-		P value	0.0384		average	0.0511	0.0276
			0.0867	0.038		P value summary	*		std	0.0201194	0.0084217
			0.0512	0.0221		Significantly different (P < 0.05)?	Yes		sem	0.00821373	0.0037663
			0.031	0.0307		One- or two-tailed P value?	Two-tailed
			0.046	0.0164		t, df	t=2.424, df=9
			0.0342	0.0308
			0.0575			How big is the difference?
						Mean of column A	0.0511
						Mean of column B	0.0276
						Difference between means (B - A) ± SEM	-0.02350 ± 0.009696
						95% confidence interval	-0.04543 to -0.001566
						R squared (eta squared)	0.3949
						F test to compare variances
						F, DFn, Dfd	5.707, 5, 4
						P value	0.1164
						P value summary	ns
						Significantly different (P < 0.05)?	No
						Data analyzed
						Sample size, column A	6
						Sample size, column B	5
