# Supplementary material for: Transcriptional control of motor pool formation and motor circuit connectivity by the LIM-HD protein Isl2
Source: eLife. 2023 Oct 23;12:e84596. doi: 10.7554/eLife.84596 (PMC10637776; doi:10.7554/eLife.84596)
Supplement: Figure 9—source data 2. [file elife-84596-fig9-data2.xlsx]

## Sheet: Sheet1
Figure 9h
Frequency (Hz)		Isl2 +/-	Isl2 -/-		Unpaired t test				Isl2 +/-	Isl2 -/-
# of peaks/time		863.836	904.11		P value	< 0.0001		average	861.985	618.962
		846.599	664.395		P value summary	****		std	112.838	100.64
		563.499	618.132		Significantly different? (P < 0.05)	Yes		sem	17.6224	16.1154
		792.541	651.89		One- or two-tailed P value?	Two-tailed
		1013.82	567.082		t, df	t=10.15 df=78
		799.239	571.121
		651.997	824.916		How big is the difference?
		718.391	591.631		Mean ± SEM of column A	862.0 ± 17.62
		753.86	645.635		Mean ± SEM of column B	619.0 ± 16.12
		880.399	714.286		Difference between means	-243.0 ± 23.95
		794.271	626.632		95% confidence interval	-290.7 to -195.3
		881.226	678.514		R square	0.569
		875.764	852.018
		905.045	627.376		F test to compare variances
		887.64	604.027		F,DFn, Dfd	1.257, 40, 38
		785.303	726.979		P value	0.4805
		931.436	598.706		P value summary	ns
		866.426	637.119		Significantly different? (P < 0.05)	No
		944.255	650
		1122.81	536.398		Data analyzed
		950.226	652.985		Sample size, column A	41
		1004.9	653.951		Sample size, column B	39
		981.735	703.971
		1016.26	632.319
		1021.8	631.229
		1026.94	696.517
		910.596	483.871
		1024.39	579.196
		773.015	624.506
		755.02	529.378
		713.178	588.235
		826.052	479.452
		797.546	582.278
		843.806	492.866
		894.617	416.667
		822.343	559.006
		863.37	461.538
		856.93	561.622
		840.401	518.962
		808.95
		730.949
Figure 9i		Isl2 +/-	Isl2 -/-		Unpaired t test				Isl2 +/-	Isl2 -/-
# of peaks		59	33		P value	< 0.0001		average	80.1463	41.6154
		117	39		P value summary	****		std	23.0191	17.9027
		67	45		Significantly different? (P < 0.05)	Yes		sem	3.59498	2.86672
		68	50		One- or two-tailed P value?	Two-tailed
		22	41		t, df	t=8.328 df=78
		84	53
		80	49		How big is the difference?
		100	41		Mean ± SEM of column A	80.15 ± 3.595
		83	88		Mean ± SEM of column B	41.62 ± 2.867
		53	45		Difference between means	-38.53 ± 4.627
		61	24		95% confidence interval	-47.74 to -29.32
		69	42		R square	0.4707
		86	38
		61	33		F test to compare variances
		79	36		F,DFn, Dfd	1.653, 40, 38
		109	45		P value	0.1223
		72	37		P value summary	ns
		72	46		Significantly different? (P < 0.05)	No
		83	39
		64	42		Data analyzed
		63	70		Sample size, column A	41
		41	48		Sample size, column B	39
		86	39
		50	54
		75	19
		61	56
		55	33
		42	49
		110	79
		94	91
		92	18
		104	35
		91	23
		94	38
		118	13
		106	18
		103	12
		115	36
		109	26
		94
		94
Figure 9j		Isl2 +/-	Isl2 -/-		Unpaired t test				Isl2 +/-	Isl2 -/-
Duration time of 1 step		0.0683	0.0365		P value	0.0001		average	0.0960512	0.0675872
		0.1382	0.0587		P value summary	***		std	0.032842	0.029812
		0.1189	0.0728		Significantly different? (P < 0.05)	Yes		sem	0.00512905	0.00477374
		0.0858	0.0767		One- or two-tailed P value?	Two-tailed
		0.0217	0.0723		t, df	t=4.052 df=78
		0.1051	0.0928
		0.1227	0.0594		How big is the difference?
		0.1392	0.0693		Mean ± SEM of column A	0.09605 ± 0.005129
		0.1101	0.1363		Mean ± SEM of column B	0.06759 ± 0.004774
		0.0602	0.063		Difference between means	-0.02846 ± 0.007024
		0.0768	0.0383		95% confidence interval	-0.04245 to -0.01448
		0.0783	0.0619		R square	0.1739
		0.0982	0.0446
		0.0674	0.0526		F test to compare variances
		0.089	0.0596		F,DFn, Dfd	1.214, 40, 38
		0.1388	0.0619		P value	0.5507
		0.0773	0.0618		P value summary	ns
		0.0831	0.0722		Significantly different? (P < 0.05)	No
		0.0879	0.06
		0.057	0.0783		Data analyzed
		0.0663	0.1072		Sample size, column A	41
		0.0408	0.0734		Sample size, column B	39
		0.0876	0.0554
		0.0492	0.0854
		0.0734	0.0301
		0.0594	0.0804
		0.0604	0.0682
		0.041	0.0846
		0.1423	0.1265
		0.1245	0.1719
		0.129	0.0306
		0.1259	0.073
		0.1141	0.0395
		0.1114	0.0771
		0.1319	0.0312
		0.1289	0.0322
		0.1193	0.026
		0.1342	0.0641
		0.1297	0.0501
		0.1162
		0.1286
