# Supplementary figures and images for: Transcriptional control of motor pool formation and motor circuit connectivity by the LIM-HD protein Isl2
Source: eLife journal article supplement (doi:10.7554/elife.84596), 2023-10-23

Figure 3-figure supplement 1

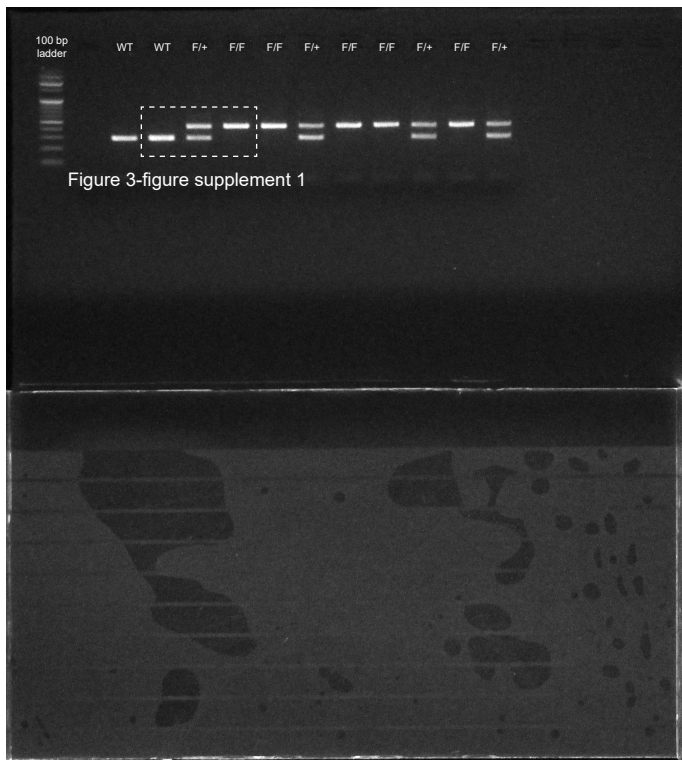

Supplement: supp [file elife-84596-supp-v1.zip]

Figure 5b

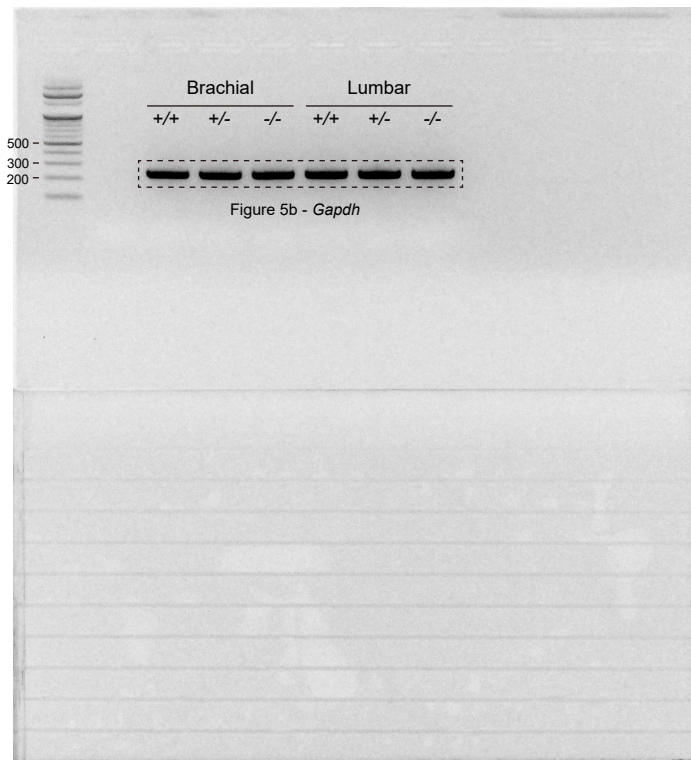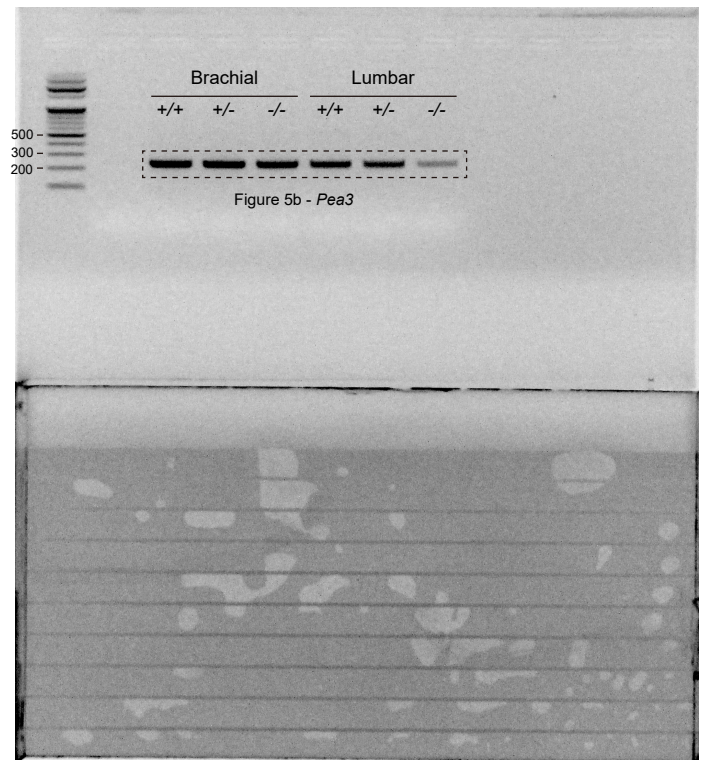

Supplement: supp [file elife-84596-supp-v1.zip]
